# Supplementary material
Source: MDPI journal article supplement (https://www.mdpi.com/2073-4441/16/7/1024)
Supplement: s1 [file s1]

# Colloidal Filterable Bacteria Enhance Ammonia Nitrogen Enrichment in River Colloids under Different Turbidity Conditions: Bacterial Diversity, Assembly Mechanism, and Nitrogen Transformation

Lihua Niu <sup>1,2,\*</sup>, Rui Chen <sup>1</sup>, Yi Li <sup>1</sup>, Yamei Chen <sup>1</sup>, Wenlong Zhang <sup>1</sup>, Huanjun Zhang <sup>1</sup> and Longfei Wang <sup>1</sup>

<sup>1</sup> Key Laboratory of Integrated Regulation and Resource Development on Shallow Lakes, Ministry of Education, College of Environment, Hohai University, Nanjing 210098, China

<sup>2</sup> Key Laboratory of Intelligent Health Perception and Ecological Restoration of Rivers and Lakes, Ministry of Education, Hubei University of Technology, Changsha, 430068, China

\* Correspondence: niulh@hhu.edu.cn

## Supporting information

**Table S1.** Physical and chemical indices of overlying water in situ.

| Site | Turbidity (NTU) | SD (cm) | pH    | T (°C) | ORP (mV) | Cond. (μS/cm) | DO   | Velocity (m/s) | Group |
|------|-----------------|---------|-------|--------|----------|---------------|------|----------------|-------|
| 1    | 6.00            | 50      | 7.000 | 23.0   | 69.4     | 252           | 6.95 | 4.83           | LT    |
| 2    | 7.43            | 50      | 7.400 | 23.2   | 50.1     | 259           | 7.10 | 5.09           | LT    |
| 3    | 9.15            | 50      | 7.845 | 23.0   | 38.2     | 360           | 7.50 | 4.96           | LT    |
| 4    | 15.33           | 50      | 7.652 | 21.8   | 54.6     | 478           | 7.79 | 5.46           | MT    |
| 5    | 17.27           | 50      | 9.122 | 21.1   | 27.0     | 546           | 4.50 | 4.87           | MT    |
| 6    | 18.27           | 50      | 8.108 | 23.3   | 89.3     | 451           | 4.55 | 5.00           | MT    |
| 7    | 18.87           | 50      | 7.078 | 23.1   | 13.1     | 1136          | 3.56 | 5.46           | MT    |
| 8    | 20.67           | 50      | 8.712 | 20.6   | 133.6    | 453           | 5.01 | 5.90           | MT    |
| 9    | 28.00           | 50      | 8.478 | 25.0   | 5.9      | 407           | 4.92 | 6.24           | MT    |
| 10   | 28.95           | 50      | 7.545 | 23.7   | 10.9     | 910           | 5.21 | 5.13           | MT    |
| 11   | 30.75           | 50      | 7.505 | 23.1   | 8.1      | 421           | 5.16 | 6.00           | HT    |
| 12   | 38.77           | 50      | 7.642 | 19.2   | 18.3     | 456           | 3.06 | 6.31           | HT    |
| 13   | 43.01           | 50      | 7.544 | 25.0   | 10.7     | 419           | 4.72 | 7.00           | HT    |
| 14   | 46.18           | 50      | 6.404 | 21.4   | 111.1    | 421           | 4.80 | 6.54           | HT    |
| 15   | 50.74           | 50      | 8.530 | 22.5   | 165.8    | 420           | 4.27 | 7.9            | HT    |
| 16   | 56.66           | 50      | 6.890 | 19.9   | 35.9     | 428           | 5.47 | 7.13           | HT    |
| 17   | 89.72           | 50      | 6.549 | 25.0   | 12.0     | 419           | 4.23 | 6.79           | HT    |

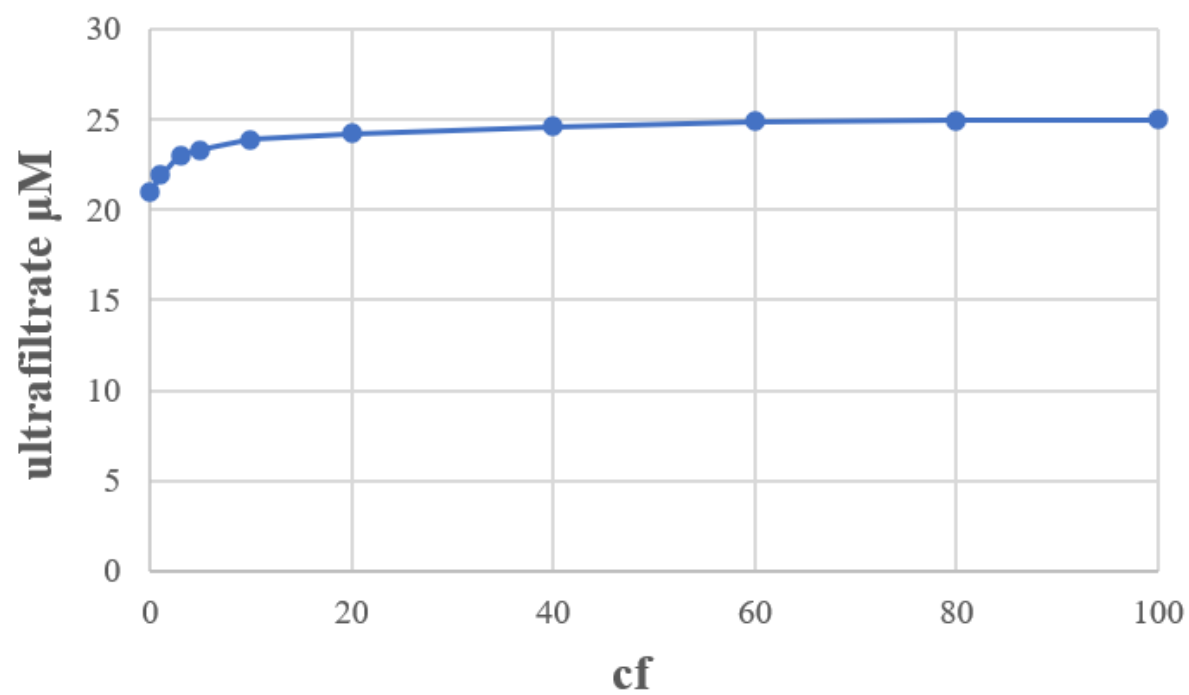

**Figure S1.** Fitting curve between different cfs and concentrations of organic carbon in ultrafiltrate.

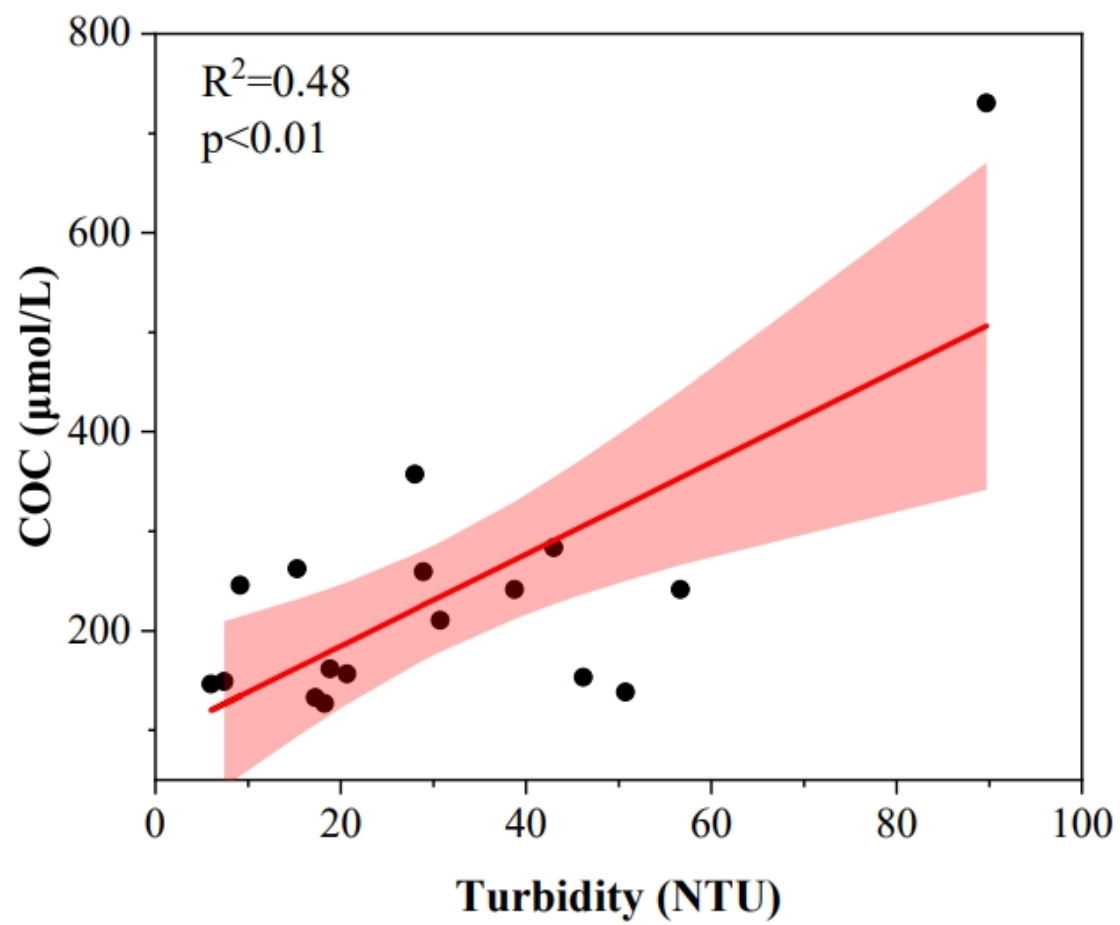

**Figure S2.** Fitting curve between concentrations of colloidal organic carbon and turbidity of river.

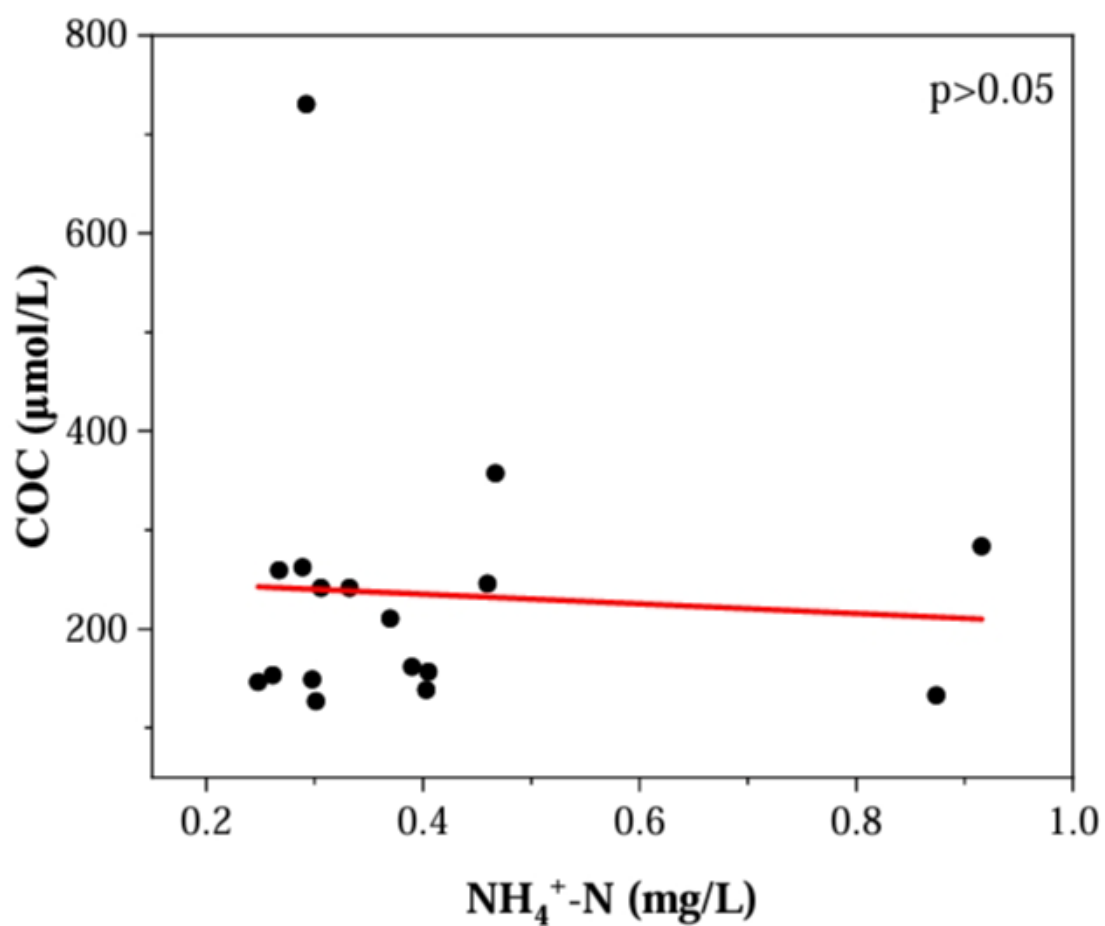

**Figure S3.** Fitting curve between concentrations of colloidal organic carbon and colloidal ammonia nitrogen.

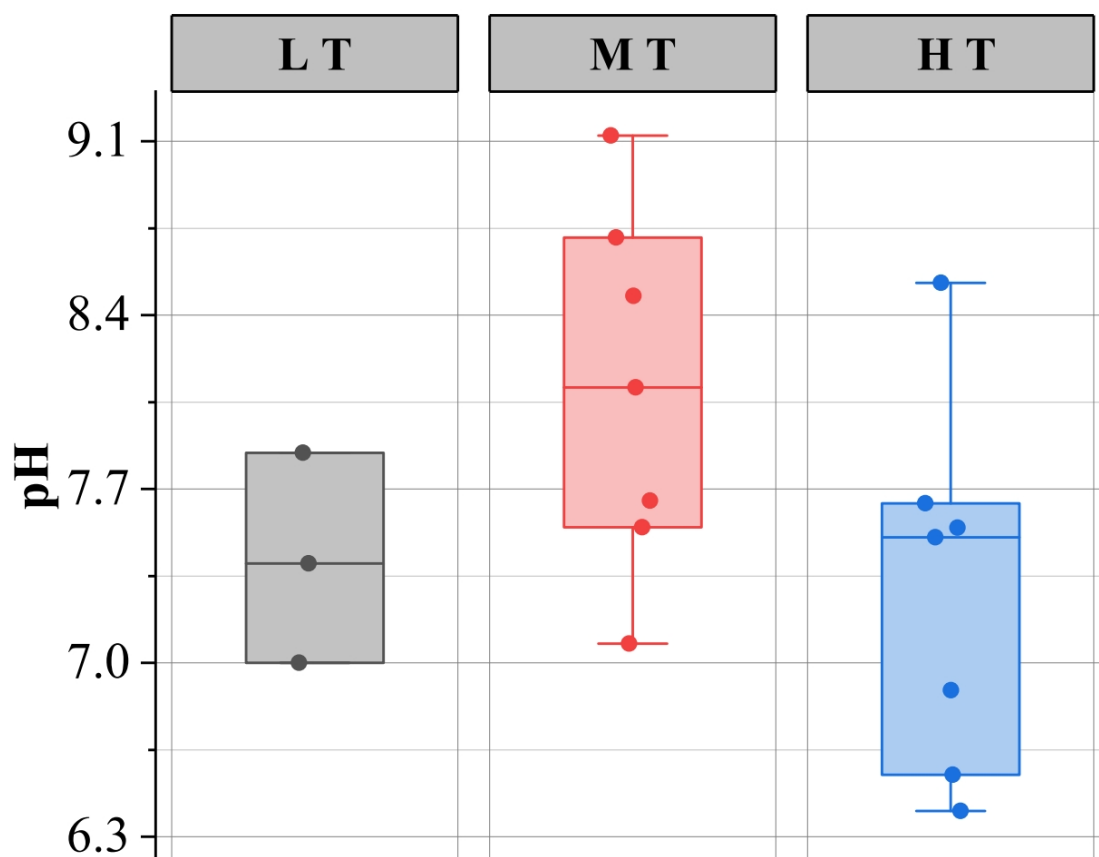

**Figure S4.** pH of three turbidity conditions.
